# Supplementary material for: Prognostic value of dobutamine stress myocardial perfusion echocardiography in patients with known or suspected coronary artery disease and normal left ventricular function
Source: PubMed Central journal article supplement (PMC5325237; doi:10.1371/journal.pone.0172280), 2017-02-24
Supplement: pone.0172280.s001.pdf [file pone.0172280.s001.pdf]

| patient | Idade | Sexo | ≥ 3FR | DM | Angina Est: | IAM P | ATC P | Nitrato | Bloq Ca | AAS | Beta-bloq |
|---------|-------|------|-------|----|-------------|-------|-------|---------|---------|-----|-----------|
| 1       | 40    | M    | N     | S  | S           | N     | N     | N       | N       | N   | N         |
| 2       | 46    | F    | S     | N  | S           | S     | N     | N       | S       | S   | S         |
| 3       | 42    | F    | S     | N  | N           | N     | N     | S       | N       | S   | S         |
| 4       | 61    | F    | S     | N  | N           | S     | N     | S       | N       | S   | S         |
| 5       | 64    | F    | S     | S  | S           | N     | N     | S       | N       | S   | N         |
| 6       | 78    | F    | N     | S  | S           | N     | N     | N       | N       | S   | S         |
| 7       | 64    | F    | S     | N  | N           | N     | N     | N       | N       | S   | S         |
| 8       | 49    | F    | S     | S  | S           | N     | N     | N       | N       | S   | S         |
| 9       | 53    | F    | S     | S  | S           | N     | N     | S       | N       | S   | S         |
| 10      | 44    | M    | N     | N  | N           | N     | N     | N       | N       | S   | S         |
| 11      | 54    | F    | N     | N  | N           | N     | N     | N       | N       | N   | N         |
| 12      | 52    | M    | S     | N  | S           | N     | N     | S       | S       | S   | S         |
| 13      | 35    | M    | N     | N  | S           | N     | N     | N       | N       | S   | S         |
| 14      | 49    | M    | S     | N  | N           | N     | N     | N       | N       | N   | S         |
| 15      | 59    | M    | N     | N  | S           | N     | S     | S       | N       | S   | S         |
| 16      | 56    | M    | N     | N  | N           | N     | N     | N       | N       | N   | N         |
| 17      | 72    | M    | S     | N  | N           | N     | S     | S       | S       | S   | S         |
| 18      | 52    | M    | N     | N  | S           | N     | N     | N       | N       | N   | N         |
| 19      | 59    | M    | S     | S  | N           | N     | S     | N       | S       | S   | S         |
| 20      | 50    | M    | S     | N  | N           | N     | N     | S       | S       | S   | N         |
| 21      | 60    | M    | S     | N  | N           | N     | N     | N       | N       | S   | N         |
| 22      | 49    | M    | N     | N  | N           | S     | N     | N       | N       | S   | S         |
| 23      | 65    | M    | S     | N  | S           | S     | N     | S       | N       | S   | S         |
| 24      | 59    | M    | S     | S  | S           | N     | N     | N       | N       | S   | S         |
| 25      | 55    | M    | S     | S  | N           | N     | N     | N       | N       | S   | S         |
| 26      | 57    | M    | S     | S  | N           | S     | S     | N       | S       | S   | S         |
| 27      | 67    | F    | S     | S  | S           | N     | N     | N       | S       | S   | S         |
| 28      | 71    | M    | S     | N  | S           | N     | N     | N       | N       | S   | S         |
| 29      | 58    | F    | S     | S  | S           | S     | N     | N       | N       | N   | N         |
| 30      | 68    | M    | S     | S  | S           | N     | N     | S       | N       | S   | S         |
| 31      | 51    | M    | S     | S  | S           | N     | N     | N       | S       | S   | N         |
| 32      | 67    | M    | N     | N  | S           | N     | N     | S       | S       | S   | S         |
| 33      | 53    | M    | S     | N  | N           | N     | N     | N       | S       | S   | S         |
| 34      | 55    | F    | S     | S  | S           | N     | N     | N       | S       | S   | S         |
| 35      | 70    | F    | S     | N  | N           | N     | N     | S       | N       | S   | N         |
| 36      | 48    | M    | S     | N  | N           | N     | N     | N       | N       | S   | S         |
| 37      | 68    | F    | S     | S  | N           | N     | N     | S       | S       | S   | S         |
| 38      | 70    | F    | N     | N  | S           | N     | N     | N       | N       | S   | S         |
| 39      | 68    | M    | S     | S  | N           | S     | N     | N       | S       | S   | N         |
| 40      | 67    | F    | S     | S  | S           | N     | S     | N       | S       | S   | S         |
| 41      | 49    | M    | N     | N  | S           | N     | N     | N       | S       | S   | N         |
| 42      | 63    | M    | N     | N  | N           | N     | N     | N       | N       | S   | S         |
| 43      | 67    | M    | S     | N  | S           | S     | N     | N       | S       | S   | S         |
| 44      | 65    | M    | S     | N  | S           | N     | N     | N       | N       | S   | N         |
| 45      | 53    | M    | N     | N  | N           | N     | S     | S       | N       | N   | S         |
| 46      | 53    | F    | S     | S  | N           | N     | N     | N       | S       | S   | N         |
| 47      | 76    | F    | S     | S  | S           | N     | N     | S       | N       | S   | S         |
| 48      | 61    | F    | S     | N  | N           | N     | N     | N       | N       | N   | S         |
| 49      | 66    | F    | S     | S  | S           | N     | N     | N       | N       | S   | S         |

|    |      |   |   |   |   |   |   |   |   |   |
|----|------|---|---|---|---|---|---|---|---|---|
| 50 | 53 F | S | N | S | N | N | N | N | S | N |
| 51 | 64 M | N | S | S | N | S | N | N | S | S |
| 52 | 51 M | S | S | S | N | N | N | N | S | S |
| 53 | 55 M | S | S | N | N | N | S | N | S | S |
| 54 | 59 M | S | N | N | S | S | S | N | S | S |
| 55 | 63 M | S | N | S | S | N | N | N | S | S |
| 56 | 75 M | N | N | S | N | N | S | N | S | S |
| 57 | 62 M | S | S | S | S | N | S | S | S | N |
| 58 | 59 F | S | N | S | N | N | S | N | S | S |
| 59 | 52 M | N | S | S | S | N | N | N | S | S |
| 60 | 71 F | S | N | N | N | N | S | N | S | N |
| 61 | 63 F | S | S | S | N | N | N | S | S | S |
| 62 | 54 F | S | N | N | N | S | N | N | N | N |
| 63 | 54 M | S | S | N | N | N | N | N | S | S |
| 64 | 53 F | N | N | S | N | N | N | N | S | N |
| 65 | 57 M | N | N | N | N | N | N | N | S | S |
| 66 | 58 F | S | N | N | N | N | N | S | S | S |
| 67 | 67 F | S | N | N | N | S | S | N | S | N |
| 68 | 53 F | S | N | S | N | N | N | S | S | N |
| 69 | 58 F | S | N | N | N | N | N | N | N | S |
| 70 | 51 M | S | N | N | N | N | N | N | S | S |
| 71 | 67 F | S | N | S | N | N | S | N | S | N |
| 72 | 72 F | S | S | S | N | S | S | N | S | S |
| 73 | 62 M | N | N | N | S | S | S | N | S | S |
| 74 | 62 F | N | N | S | N | N | N | N | S | S |
| 75 | 44 M | S | S | N | S | N | N | N | N | S |
| 76 | 65 M | S | S | S | N | N | N | N | S | N |
| 77 | 72 M | N | N | S | N | N | N | N | S | N |
| 78 | 62 M | N | N | S | N | N | N | N | S | S |
| 79 | 52 M | S | N | N | S | N | N | N | S | S |
| 80 | 51 M | S | N | N | N | N | N | S | S | S |
| 81 | 60 M | S | N | S | N | N | N | N | S | S |
| 82 | 56 M | S | S | S | N | N | S | N | S | S |
| 83 | 51 M | N | N | N | N | N | N | N | S | S |
| 84 | 43 M | S | N | N | N | N | N | N | S | S |
| 85 | 64 M | S | S | N | N | N | S | S | S | S |
| 86 | 46 M | N | S | N | N | N | S | N | S | S |
| 87 | 68 M | S | N | N | N | N | N | N | S | S |
| 88 | 59 M | S | S | N | S | N | N | N | S | N |
| 89 | 42 M | N | N | N | N | N | N | N | S | S |
| 90 | 46 M | N | N | S | N | N | N | N | N | S |
| 91 | 63 M | S | N | N | N | N | N | N | N | S |
| 92 | 53 F | S | N | N | N | N | N | S | S | S |
| 93 | 64 F | S | N | S | N | N | S | N | S | S |
| 94 | 50 M | S | S | S | N | N | N | N | S | N |
| 95 | 62 M | S | S | N | N | N | N | N | S | S |
| 96 | 47 M | S | N | N | N | N | N | N | N | N |
| 97 | 52 F | S | N | S | N | N | N | N | S | S |
| 98 | 44 M | S | S | N | N | N | N | N | S | N |
| 99 | 50 F | N | S | S | N | S | S | N | S | S |

|     |      |   |   |   |   |   |   |   |   |   |
|-----|------|---|---|---|---|---|---|---|---|---|
| 100 | 64 M | S | S | N | N | N | N | S | S | S |
| 101 | 78 F | N | S | N | N | N | N | N | S | S |
| 102 | 68 M | S | S | N | N | N | N | N | S | S |
| 103 | 64 M | S | S | N | N | N | N | S | S | N |
| 104 | 57 M | S | N | N | N | N | S | N | S | S |
| 105 | 49 M | N | N | N | N | N | N | N | N | S |
| 106 | 69 F | S | S | S | N | N | S | S | S | S |
| 107 | 69 F | S | S | S | N | N | N | N | N | S |
| 108 | 56 M | N | N | S | N | N | N | N | N | N |
| 109 | 61 M | N | N | S | N | S | S | N | S | S |
| 110 | 60 F | S | S | S | N | N | N | S | S | N |
| 111 | 46 F | S | N | S | N | N | S | S | S | S |
| 112 | 62 F | N | S | N | N | N | S | N | S | S |
| 113 | 51 F | S | N | S | N | N | N | N | S | S |
| 114 | 57 F | S | N | S | S | N | S | N | S | S |
| 115 | 53 F | S | N | S | N | N | S | N | S | S |
| 116 | 75 F | N | N | N | N | N | S | N | S | S |
| 117 | 58 F | S | S | N | N | N | N | N | S | S |
| 118 | 71 F | N | S | S | N | N | N | N | S | S |
| 119 | 56 F | S | S | N | N | N | N | N | N | N |
| 120 | 46 F | N | N | N | N | N | S | N | S | S |
| 121 | 63 F | N | S | S | N | N | N | N | S | N |
| 122 | 63 F | S | S | N | S | N | S | S | S | S |
| 123 | 43 F | S | N | S | N | N | S | N | S | S |
| 124 | 57 F | N | N | N | N | N | N | S | N | S |
| 125 | 56 F | S | S | N | N | N | N | S | S | S |
| 126 | 62 F | N | N | N | N | N | S | S | S | N |
| 127 | 57 F | N | N | S | N | N | S | N | N | S |
| 128 | 60 F | S | N | N | N | N | S | S | S | S |
| 129 | 75 M | S | N | S | N | N | S | N | S | N |
| 130 | 63 F | N | S | S | N | N | N | S | S | N |
| 131 | 58 F | N | S | N | S | N | S | N | S | S |
| 132 | 64 M | S | S | N | N | N | N | N | S | S |
| 133 | 56 F | N | S | N | N | N | N | N | N | S |
| 134 | 69 F | N | S | S | N | N | N | N | S | S |
| 135 | 72 M | N | N | N | N | N | N | N | N | S |
| 136 | 52 F | N | N | S | S | N | S | N | S | S |
| 137 | 65 M | N | S | N | S | N | S | S | S | S |
| 138 | 51 M | S | N | S | S | N | N | S | S | S |
| 139 | 70 F | N | N | S | N | N | N | N | S | N |
| 140 | 60 F | S | S | N | N | N | N | S | S | N |
| 141 | 67 M | S | S | S | N | N | N | N | S | S |
| 142 | 58 M | N | N | S | S | N | S | S | S | S |
| 143 | 54 M | N | N | S | S | S | N | S | S | S |
| 144 | 57 M | S | N | S | S | N | N | N | N | S |
| 145 | 57 M | S | N | S | N | N | S | S | S | S |
| 146 | 42 M | S | N | S | N | N | S | N | S | S |
| 147 | 40 M | S | N | N | N | N | N | N | S | S |
| 148 | 72 M | N | N | N | N | N | S | N | S | N |
| 149 | 59 M | N | N | S | S | S | N | N | S | S |



| Estatina | FE (S) | DDVE | DSVE | AE | SIV | PP | DIA Fluxos     | FC b | PAS b | PAD b | FC atingi | % FC max | PAS p |
|----------|--------|------|------|----|-----|----|----------------|------|-------|-------|-----------|----------|-------|
| N        | 63     | 54   | 34   | 42 | 9   | 9  | Nor Normal     | 80   | 180   | 100   | 154       | 85       | 180   |
| S        | 60     | 53   | 36   | 40 | 11  | 10 | Pse Pseudon    | 53   | 131   | 76    | 121       | 70       | 186   |
| N        | 68     | 40   | 24   | 26 | 8   | 8  | Nor Normal     | 80   | 140   | 100   | 169       | 95       | 170   |
| S        | 60     | 53   | 34   | 38 | 9   | 8  | IM r IM moder  | 70   | 107   | 59    | 87        | 55       | 131   |
| S        | 63     | 45   | 28   | 38 | 11  | 11 | Nor Normal     | 62   | 150   | 80    | 136       | 87       | 180   |
| S        | 73     | 47   | 30   | 44 | 12  | 12 | IM c IM discre | 58   | 180   | 80    | 139       | 98       | 130   |
| S        | 72     | 46   | 30   | 36 | 9   | 8  | AR\ARV         | 46   | 120   | 70    | 138       | 88       | 140   |
| S        | 69     | 42   | 26   | 39 | 9   | 8  | Nor ARV        | 59   | 134   | 76    | 132       | 77       | 145   |
| S        | 68     | 46   | 30   | 38 | 10  | 10 | Nor Normal     | 56   | 131   | 72    | 150       | 89       | 136   |
| S        | 69     | 49   | 33   | 31 | 9   | 9  | Nor Normal     | 58   | 120   | 70    | 150       | 85       | 179   |
| N        | 64     | 40   | 26   | 32 | 7   | 7  | Normal         | 71   | 120   | 70    | 152       | 91       | 140   |
| S        | 63     | 52   | 37   | 45 | 13  | 12 | ARV            | 60   | 150   | 80    | 69        | 41       | 210   |
| S        | 70     | 47   | 30   | 37 | 10  | 8  | Nor Normal     | 62   | 110   | 80    | 163       | 88       | 150   |
| S        | 65     | 49   | 30   | 42 | 10  | 10 | Normal         | 47   | 100   | 70    | 153       | 89       | 130   |
| S        | 63     | 47   | 31   | 39 | 9   | 9  | ARV            | 41   | 120   | 80    | 123       | 73       | 140   |
| N        | 65     | 55   | 36   | 42 | 10  | 9  | IM r IM moder  | 73   | 140   | 90    | 152       | 92       | 150   |
| S        | 70     | 42   | 26   | 40 | 9   | 9  | IM c IM discre | 80   | 150   | 90    | 140       | 94       | 100   |
| S        | 65     | 43   | 27   | 30 | 10  | 10 | AR\ARV         | 75   | 130   | 82    | 160       | 95       | 140   |
| S        | 68     | 50   | 31   | 41 | 11  | 10 | ARV            | 58   | 110   | 72    | 148       | 92       | 133   |
| S        | 70     | 43   | 27   | 37 | 10  | 10 | ARV            | 70   | 120   | 90    | 149       | 87       | 150   |
| S        | 49     | 45   | 34   | 34 | 9   | 9  | ARV            | 60   | 150   | 90    | 157       | 98       | 130   |
| S        | 50     | 58   | 46   | 40 | 11  | 9  | Pseudonorma    | 63   | 113   | 74    | 154       | 90       | 169   |
| N        | 50     | 56   | 38   | 45 | 12  | 8  | AR\ARV/Ac il   | 63   | 120   | 70    | 142       | 92       | 140   |
| N        | 67     | 48   | 30   | 42 | 12  | 12 | ARV            | 66   | 130   | 70    | 158       | 98       | 160   |
| S        | 61     | 52   | 35   | 40 | 11  | 11 | AR\ARV         | 58   | 120   | 80    | 153       | 93       | 130   |
| S        | 60     | 59   | 34   | 46 | 12  | 11 | ARV/hipoc inf  | 70   | 148   | 91    | 141       | 87       | 181   |
| S        | 66     | 48   | 30   | 42 | 11  | 12 | ARV            | 58   | 130   | 80    | 125       | 82       | 130   |
| S        | 59     | 51   | 35   | 41 | 12  | 12 | ARV/ AC bas    | 44   | 131   | 71    | 120       | 80       | 156   |
| N        | 48     | 54   | 33   | 28 | 9   | 9  | Acinesia apic  | 79   | 140   | 90    | 150       | 97       | 160   |
| N        | 70     | 46   | 25   | 34 | 13  | 12 | Pseudonorma    | 58   | 147   | 65    | 145       | 95       | 164   |
| S        | 68     | 44   | 27   | 34 | 9   | 9  | AR\ARV         | 76   | 123   | 91    | 147       | 86       | 177   |
| S        | 68     | 51   | 36   | 42 | 10  | 9  | AR\ARV         | 50   | 121   | 70    | 133       | 87       | 164   |
| N        | 69     | 44   | 27   | 41 | 14  | 13 | AR\ARV/IM c    | 53   | 153   | 87    | 137       | 82       | 147   |
| S        | 68     | 47   | 32   | 33 | 13  | 12 | ARV            | 83   | 160   | 100   | 165       | 100      | 180   |
| N        | 68     | 47   | 28   | 34 | 12  | 12 | AR\ARV         | 84   | 150   | 80    | 157       | 100      | 180   |
| S        | 75     | 52   | 33   | 34 | 8   | 8  | nor Normal     | 63   | 140   | 85    | 146       | 85       | 197   |
| S        | 64     | 51   | 33   | 44 | 12  | 11 | Pseudonorma    | 64   | 140   | 90    | 131       | 86       | 180   |
| S        | 66     | 41   | 27   | 34 | 11  | 11 | AR\ARV         | 52   | 150   | 70    | 132       | 88       | 180   |
| S        | 60     | 58   | 33   | 50 | 12  | 12 | Pseudonorma    | 98   | 150   | 87    | 158       | 104      | 180   |
| S        | 66     | 43   | 25   | 35 | 8   | 8  | ARV            | 62   | 140   | 60    | 152       | 99       | 159   |
| S        | 60     | 49   | 29   | 42 | 12  | 12 | IM c IM discre | 74   | 110   | 80    | 158       | 92       | 90    |
| S        | 68     | 49   | 32   | 41 | 9   | 9  | AR\ARV         | 43   | 150   | 90    | 136       | 86       | 140   |
| N        | 62     | 47   | 30   | 36 | 10  | 10 | ARV            | 48   | 120   | 70    | 114       | 74       | 110   |
| S        | 70     | 51   | 30   | 40 | 11  | 10 | Pseudonorma    | 51   | 128   | 67    | 156       | 101      | 172   |
| N        | 64     | 41   | 26   | 34 | 8   | 8  | Normal         |      |       |       |           |          |       |
| N        | 70     | 44   | 28   | 38 | 10  | 9  | ARV            | 92   | 130   | 89    | 156       | 93       | 156   |
| S        | 71     | 45   | 27   | 37 | 10  | 9  | AR\ARV         | 50   | 110   | 80    | 122       | 85       | 90    |
| N        | 69     | 43   | 26   | 37 | 11  | 10 | Nor ARV        | 57   | 150   | 90    | 133       | 86       | 160   |
| S        | 62     | 47   | 28   | 39 | 10  | 9  | Nor Normal     | 56   | 130   | 80    | 132       | 85       | 190   |

|   |    |    |    |    |    |                    |    |     |     |     |     |     |
|---|----|----|----|----|----|--------------------|----|-----|-----|-----|-----|-----|
| N | 61 | 46 | 29 | 35 | 10 | 10 AR\ARV          | 77 | 150 | 100 | 124 | 86  | 150 |
| S | 65 | 45 | 27 | 40 | 11 | 10 ARV/IAO disc    | 79 | 164 | 89  | 141 | 90  | 216 |
| N | 66 | 55 | 32 | 42 | 13 | 13 lmd lmdiscret   | 53 | 130 | 80  | 145 | 86  | 180 |
| N | 68 | 49 | 37 | 34 | 10 | 11 AR\ARV          | 79 | 110 | 70  | 140 | 85  | 140 |
| S | 53 | 56 | 43 | 39 | 12 | 8 Pseudonorma      | 64 | 140 | 90  | 131 | 81  | 160 |
| S | 50 | 54 | 34 | 39 | 10 | 9 ARV              | 60 | 140 | 70  | 147 | 94  | 150 |
| S | 66 | 52 | 33 | 41 | 9  | 9 Nor Normal       | 62 | 130 | 40  | 93  | 64  | 140 |
| S | 66 | 49 | 30 | 39 | 10 | 9 AR\ARV           | 73 | 125 | 80  | 159 | 101 | 136 |
| N | 60 | 43 | 25 | 30 | 9  | 9 AR\ARV           | 64 | 160 | 80  | 121 | 75  | 160 |
| S | 48 | 52 | 41 | 37 | 11 | 8 AR\ARV/lmd       | 97 | 130 | 70  | 147 | 88  | 150 |
| N | 60 | 43 | 28 | 38 | 12 | 11 ARV             | 78 | 140 | 80  | 135 | 91  | 150 |
| S | 69 | 41 | 27 | 39 | 10 | 10 Pseudonorma     | 71 | 170 | 80  | 131 | 84  | 170 |
| N | 62 | 41 | 26 | 27 | 9  | 9 AR\ARV           | 61 | 110 | 80  | 143 | 86  | 90  |
| S | 70 | 59 | 34 | 41 | 12 | 11 ARV             | 75 | 120 | 100 | 148 | 89  | 179 |
| S | 64 | 41 | 27 | 30 | 8  | 9 Nor Normal       | 60 | 150 | 90  | 160 | 96  | 160 |
| N | 64 | 45 | 27 | 37 | 9  | 9 AR\ARV           | 51 | 110 | 70  | 146 | 89  | 150 |
| S | 65 | 46 | 30 | 41 | 12 | 11 ARV             | 59 | 125 | 80  | 141 | 87  | 132 |
| S | 64 | 44 | 27 | 37 | 9  | 9 ARV              | 77 | 140 | 90  | 145 | 95  | 130 |
| N | 66 | 49 | 30 | 39 | 10 | 10 AR\ARV          | 79 | 135 | 78  | 157 | 94  | 171 |
| N | 68 | 46 | 27 | 36 | 10 | 9 AR\ARV           | 67 | 140 | 80  | 137 | 85  | 150 |
| S | 63 | 40 | 28 | 38 | 12 | 12 ARV             | 51 | 110 | 70  | 145 | 86  | 100 |
| N | 71 | 45 | 26 | 40 | 10 | 9 ARV              | 75 | 120 | 60  | 138 | 90  | 120 |
| S | 70 | 52 | 30 | 41 | 10 | 9 Pseudonorma      | 58 | 175 | 69  | 150 | 101 | 198 |
| S | 50 | 57 | 33 | 41 | 10 | 8 ARV/hipoc inf    | 56 | 140 | 90  | 154 | 97  | 140 |
| S | 67 | 46 | 28 | 35 | 10 | 10 AR\ARV          | 78 | 130 | 90  | 139 | 88  | 170 |
| S | 50 | 55 | 37 | 34 | 9  | 8 ARV/Ac medi      | 67 | 100 | 68  | 148 | 85  | 152 |
| S | 69 | 48 | 31 | 44 | 11 | 11 ARV/EAO dis     | 52 | 130 | 70  | 142 | 92  | 160 |
| N | 66 | 40 | 25 | 40 | 13 | 12 ARV/IAOdisci    | 62 | 120 | 80  | 158 | 100 | 140 |
| S | 68 | 53 | 37 | 39 | 10 | 9 ARV              | 45 | 160 | 70  | 152 | 96  | 180 |
| S | 59 | 54 | 37 | 43 | 9  | 9 AR\ARV/Hipc      | 52 | 132 | 91  | 132 | 78  | 140 |
| S | 69 | 45 | 28 | 36 | 13 | 11 ARV             | 59 | 150 | 100 | 157 | 93  | 180 |
| S | 68 | 50 | 32 | 40 | 12 | 12 ARV             |    |     |     |     |     |     |
| S | 65 | 45 | 29 | 34 | 9  | 9 AR\ARV           | 62 | 120 | 70  | 145 | 93  | 190 |
| N | 66 | 47 | 30 | 36 | 11 | 10 Nor Normal      | 63 | 90  | 60  | 150 | 88  | 110 |
| S | 50 | 64 | 41 | 48 | 11 | 11 IM discreta     | 84 | 120 | 80  | 159 | 89  | 190 |
| N | 63 | 45 | 28 | 41 | 13 | 12 AR\ARV          | 75 | 180 | 80  | 133 | 86  | 180 |
| N | 65 | 47 | 29 | 37 | 11 | 9 Nor Normal       | 65 | 127 | 82  | 144 | 83  | 170 |
| S | 70 | 47 | 30 | 40 | 10 | 10 Pseudonorma     | 50 | 120 | 72  | 152 | 100 | 180 |
| N | 55 | 54 | 40 | 45 | 10 | 10 lMd lMd discret | 47 | 120 | 80  | 114 | 71  | 140 |
| S | 70 | 44 | 26 | 32 | 10 | 10 normal          | 62 | 130 | 80  | 154 | 86  | 170 |
| N | 65 | 50 | 31 | 34 | 11 | 10 Normal          | 56 | 114 | 66  | 154 | 89  | 160 |
| S | 62 | 48 | 29 | 29 | 8  | 8 Nor Normal       | 65 | 130 | 80  | 137 | 87  | 150 |
| N | 70 | 47 | 30 | 35 | 11 | 11 Nor Normal      | 84 | 155 | 95  | 156 | 93  | 175 |
| S | 65 | 41 | 27 | 40 | 10 | 10 ARV             | 58 | 178 | 82  | 135 | 86  | 173 |
| S | 70 | 51 | 30 | 40 | 11 | 11 AR\ARV          | 77 | 138 | 76  | 158 | 93  | 136 |
| S | 62 | 54 | 36 | 39 | 9  | 9 Nor Normal       | 58 | 120 | 70  | 137 | 86  | 150 |
| S | 66 | 50 | 30 | 38 | 11 | 10 Normal          | 54 | 130 | 70  | 148 | 86  | 160 |
| N | 72 | 46 | 29 | 33 | 9  | 9 Nor Normal       | 85 | 120 | 80  | 151 | 91  | 150 |
| S | 73 | 51 | 30 | 40 | 10 | 10 Nor Normal      | 75 | 128 | 87  | 154 | 88  | 134 |
| S | 68 | 40 | 21 | 38 | 12 | 11 AR\ARV          | 70 | 111 | 73  | 144 | 85  | 110 |

|   |    |    |    |    |    |    |               |    |     |     |     |     |     |
|---|----|----|----|----|----|----|---------------|----|-----|-----|-----|-----|-----|
| S | 60 | 47 | 30 | 39 | 12 | 11 | ARV/IAOdiscr  | 47 | 130 | 60  | 133 | 85  | 170 |
| N | 62 | 46 | 28 | 35 | 10 | 10 | Imd lmdiscret | 46 | 100 | 60  | 130 | 91  | 150 |
| S | 55 | 59 | 40 | 58 | 14 | 11 | IM moderada   | 50 | 150 | 100 | 140 | 92  | 190 |
| S | 65 | 47 | 30 | 40 | 12 | 12 | ARV           | 90 | 170 | 80  | 160 | 100 | 180 |
| N | 65 | 44 | 29 | 37 | 12 | 13 | ARV           | 68 | 150 | 80  | 148 | 91  | 190 |
| N | 66 | 47 | 30 | 36 | 8  | 9  | Normal        | 63 | 120 | 70  | 153 | 89  | 188 |
| S | 71 | 48 | 30 | 40 | 11 | 11 | ARV           | 59 | 175 | 71  | 127 | 85  | 190 |
| S | 71 | 52 | 30 | 36 | 9  | 8  | ARV           | 64 | 129 | 55  | 129 | 85  | 155 |
| S | 68 | 40 | 25 | 30 | 9  | 9  | Nor Normal    | 55 | 90  | 80  | 143 | 87  | 170 |
| S | 61 | 49 | 30 | 35 | 11 | 10 | ARV           | 56 | 130 | 70  | 103 | 65  | 140 |
| N | 62 | 48 | 27 | 35 | 10 | 9  | IMd lmdiscret | 77 | 140 | 60  | 139 | 87  | 150 |
| S | 68 | 45 | 28 | 40 | 9  | 9  | AR\ARV        | 74 | 130 | 80  | 152 | 87  | 200 |
| N | 64 | 42 | 25 | 28 | 9  | 9  | AR\ARV        | 88 | 140 | 70  | 142 | 90  | 190 |
| S | 60 | 51 | 34 | 34 | 9  | 9  | ARV/Ac basa   | 88 | 140 | 70  | 142 | 90  | 190 |
| S | 57 | 48 | 31 | 38 | 11 | 11 | AR\ARV/hipc   | 62 | 144 | 57  | 148 | 91  | 120 |
| S | 64 | 44 | 25 | 32 | 9  | 9  | AR\ARV        | 83 | 120 | 70  | 164 | 98  | 140 |
| S | 60 | 47 | 30 | 49 | 11 | 10 | Pseudonorma   | 53 | 178 | 83  | 126 | 87  | 195 |
| S | 55 | 58 | 39 | 40 | 9  | 8  | Pseudonorma   | 47 | 121 | 48  | 142 | 88  | 134 |
| S | 66 | 41 | 26 | 33 | 10 | 9  | ARV/lmdiscre  | 65 | 120 | 60  | 150 | 101 | 140 |
| N | 63 | 46 | 31 | 41 | 10 | 10 | ARV           | 65 | 140 | 90  | 137 | 84  | 170 |
| S | 62 | 39 | 26 | 31 | 8  | 8  | Nor Normal    |    |     |     |     |     |     |
| S | 68 | 42 | 28 | 40 | 9  | 9  | ARV           | 90 | 150 | 70  | 164 | 100 | 170 |
| S | 50 | 49 | 31 | 40 | 12 | 9  | ARV/Hipoc in  | 87 | 180 | 100 | 147 | 94  | 190 |
| S | 62 | 46 | 27 | 32 | 8  | 8  | Nor Normal    | 52 | 90  | 60  | 144 | 81  | 130 |
| S | 67 | 48 | 31 | 35 | 10 | 10 | ARV           | 52 | 138 | 70  | 143 | 88  | 156 |
| S | 72 | 45 | 27 | 41 | 11 | 11 | AR\ARV        | 75 | 136 | 83  | 142 | 86  | 160 |
| S | 74 | 43 | 28 | 38 | 11 | 9  | Normal        |    |     |     |     |     |     |
| S | 68 | 39 | 24 | 30 | 10 | 8  | lmdiscreta    |    |     |     |     |     |     |
| S | 69 | 50 | 29 | 38 | 10 | 10 | Normal        | 62 | 120 | 70  | 135 | 85  | 130 |
| S | 65 | 56 | 37 | 45 | 10 | 10 | ARV/lmdiscre  | 64 | 160 | 90  | 132 | 91  | 180 |
| S | 60 | 42 | 26 | 31 | 9  | 9  | ARV           | 84 | 110 | 70  | 146 | 93  | 129 |
| S | 62 | 45 | 29 | 37 | 9  | 9  | ARV/Hipoc aq  | 60 | 160 | 80  | 98  | 60  | 140 |
| S | 65 | 47 | 30 | 35 | 9  | 9  | ARV           | 63 | 130 | 80  | 154 | 99  | 130 |
| S | 69 | 36 | 24 | 28 | 8  | 9  | ARV           |    |     |     |     |     |     |
| S | 65 | 39 | 27 | 34 | 9  | 7  | Normal        |    |     |     |     |     |     |
| N | 60 | 50 | 34 | 35 | 12 | 11 | ARV/IAOdiscr  | 56 | 110 | 70  | 137 | 92  | 150 |
| N | 61 | 47 | 32 | 34 | 8  | 8  | ARV/Ac apica  | 60 | 100 | 70  | 112 | 67  | 100 |
| S | 63 | 52 | 30 | 33 | 11 | 11 | ARV/Hipocine  | 67 | 151 | 88  | 137 | 88  | 162 |
| S | 60 | 46 | 29 | 35 | 12 | 11 | AR\ARV/Acir   | 69 | 120 | 90  | 157 | 93  | 140 |
| N | 68 | 40 | 26 | 38 | 12 | 11 | ARV/lmdiscre  | 62 | 176 | 92  | 141 | 94  | 160 |
| S | 63 | 41 | 28 | 38 | 9  | 9  | AR\ARV        | 70 | 170 | 90  | 144 | 90  | 130 |
| S | 65 | 46 | 29 | 29 | 8  | 8  | Normal        |    |     |     |     |     |     |
| S | 55 | 61 | 42 | 41 | 11 | 11 | ARV/lmdisc/l  | 43 | 113 | 65  | 144 | 88  | 129 |
| S | 64 | 52 | 35 | 40 | 10 | 10 | ARV/Hipoc aq  | 55 | 120 | 70  | 152 | 92  | 130 |
| S | 62 | 53 | 36 | 44 | 10 | 9  | Normal        | 54 | 124 | 72  | 163 | 100 | 170 |
| N | 60 | 44 | 28 | 43 | 17 | 15 | ARV           | 57 | 114 | 76  | 147 | 90  | 149 |
| N | 63 | 48 | 28 | 36 | 9  | 9  | nor Normal    |    |     |     |     |     |     |
| N | 66 | 52 | 31 | 36 | 10 | 10 | normal        | 46 | 130 | 80  | 154 | 100 | 160 |
| N | 62 | 42 | 25 | 32 | 9  | 9  | IAO IAO/IM di | 65 | 160 | 80  | 154 | 100 | 150 |
| S | 47 | 60 | 46 | 38 | 12 | 8  | ARV/Hipo inf  | 76 | 140 | 90  | 158 | 98  | 160 |

|   |    |    |    |    |    |                  |    |     |    |     |     |     |
|---|----|----|----|----|----|------------------|----|-----|----|-----|-----|-----|
| N | 63 | 45 | 27 | 34 | 8  | 8 Normal         | 61 | 120 | 80 | 159 | 98  | 150 |
| S | 65 | 59 | 34 | 38 | 10 | 9 Normal         | 85 | 120 | 80 | 159 | 94  | 180 |
| S | 62 | 50 | 39 | 44 | 10 | 8 Normal         |    |     |    |     |     |     |
| S | 63 | 47 | 29 | 43 | 12 | 12 AR\ARV/IM c   | 56 | 160 | 70 | 135 | 92  | 100 |
| N | 64 | 46 | 26 | 32 | 9  | 9 Nor Normal     | 59 | 130 | 70 | 138 | 88  | 150 |
| S | 74 | 42 | 22 | 42 | 10 | 9 AR\ARV         | 69 | 140 | 80 | 138 | 86  | 130 |
| S | 74 | 44 | 28 | 35 | 10 | 10 lmdiscreta/IA |    |     |    |     |     |     |
| S | 68 | 51 | 30 | 42 | 13 | 13 ARV           | 66 | 140 | 90 | 156 | 100 | 170 |
| S | 70 | 44 | 28 | 35 | 9  | 9 Normal         |    |     |    |     |     |     |
| S | 62 | 50 | 29 | 45 | 11 | 10 Normal        |    |     |    |     |     |     |
| S | 50 | 60 | 40 | 44 | 13 | 12 Pseudonorm    | 53 | 172 | 99 | 141 | 89  | 160 |
| S | 64 | 44 | 28 | 32 | 9  | 9 AR\ARV         | 61 | 120 | 70 | 159 | 94  | 130 |
| N | 67 | 43 | 27 | 41 | 10 | 10 Normal        | 58 | 120 | 70 | 146 | 85  | 140 |
| S | 65 | 48 | 30 | 35 | 10 | 10 AR\ARV        | 60 | 150 | 70 | 160 | 91  | 180 |
| N | 70 | 45 | 28 | 33 | 8  | 8 IAO discreta   | 61 | 140 | 80 | 153 | 96  | 150 |
| S | 62 | 43 | 28 | 33 | 9  | 9 ARV            | 60 | 120 | 80 | 139 | 86  | 140 |
| S | 65 | 48 | 31 | 36 | 11 | 10 AR\ARV        | 56 | 130 | 70 | 140 | 89  | 180 |
| S | 68 | 50 | 31 | 40 | 11 | 11 ARV/discreta  | 60 | 142 | 72 | 139 | 90  | 210 |
| S | 65 | 40 | 26 | 30 | 8  | 8 AR\ARV/IM c    | 56 | 120 | 70 | 155 | 97  | 150 |





|     |    |        |   |   |   |   |   |   |   |
|-----|----|--------|---|---|---|---|---|---|---|
| 70  |    | S      | N | N | S | N | N | N | N |
| 100 | 30 | 0 N    | N | N | N | N | N | N | N |
| 90  |    | N      | N | N | N | N | N | N | N |
| 70  |    | S      | S | N | S | N | N | N | N |
| 90  | 40 | 0 N    | N | N | N | N | N | N | N |
| 80  | 40 | 1,25 N | N | N | N | N | N | N | N |
| 30  |    | S      | S | N | S | N | N | N | N |
| 64  |    | S      | N | N | S | N | N | N | N |
| 90  |    | N      | N | N | N | N | N | N | N |
| 70  |    | S      | S |   | N | N | N | N | N |
| 72  | 20 | 0,75 S | N | N | S | N | N | N | N |
| 90  | 40 | 0 S    | S | N | S | N | N | N | N |
| 60  |    | N      | N | N | N | N | N | N | N |
| 103 | 30 | 0 N    | N | N | N | N | N | N | N |
| 90  |    | S      | S | N | N | N | N | N | N |
| 80  |    | S      | N | N | S | N | N | N | N |
| 66  | 30 | 1,25 N | N | N | N | N | N | N | N |
| 80  | 20 | 0,5 S  | N | N | S | N | N | N | N |
| 82  |    | N      | N | N | N | N | N | N | N |
| 80  |    | S      | N | N | S | N | N | N | N |
| 70  | 30 | 1,5 S  | N | N | S | N | N | N | N |
| 60  | 20 | 0,25 S | N | N | S | N | N | N | N |
| 68  | 20 | 0,5 S  | S | N | S | N | N | N | N |
| 90  | 30 | 1 S    | S | N | N | N | N | N | N |
| 90  |    | N      | N | N | N | N | N | N | N |
| 96  | 40 | 2 S    | N | N | S | N | N | N | N |
| 80  | 30 | 1 S    | N | N | S | N | N | N | N |
| 100 | 30 | 0,5 N  | N | N | N | N | N | N | N |
| 100 | 30 | 0,75 S | N | N | N | S | N | N | N |
| 70  |    | S      | N | N | S | N | N | N | N |
| 80  | 30 | 0,5 S  | N | N | S | N | N | N | N |
|     | 40 | 1,5    |   |   |   |   |   |   |   |
| 100 |    | S      | N | N | N | N | S | N | N |
| 70  |    | S      | S | N | S | N | S | N | N |
| 140 | 30 | 0,75 S | N | N | S | S | N | N | N |
| 90  |    | N      | N | N | N | N | N | N | N |
| 90  |    | N      | N | N | N | N | N | N | N |
| 102 | 30 | 1,5 S  | S | N | N | S | N | N | N |
| 60  |    | S      | S | N | N | N | N | N | N |
| 90  | 30 | 0,75 N | N | N | N | N | N | N | N |
| 80  | 40 | 1 N    | N | N | N | N | N | N | N |
| 60  |    | S      | N | N | S | N | N | N | N |
| 98  |    | N      | N | N | N | N | N | N | N |
| 93  | 40 | 1,5 S  | S | N | N | N | N | N | N |
| 68  |    | S      | S | N | N | N | N | N | N |
| 60  |    | S      | N | N | S | N | N | N | N |
| 70  | 30 | 0,75 S | N | N | S | N | N | N | N |
| 70  |    | S      | N | N | S | N | N | N | N |
| 72  |    | S      | S | N | S | N | N | N | S |
| 70  |    | S      | S | N | N | N | N | N | N |

|     |    |        |   |   |   |   |   |   |   |
|-----|----|--------|---|---|---|---|---|---|---|
| 80  | 40 | 2 S    | N | N | S | N | N | N | N |
| 80  |    | N      | N | N | N | N | N | N | N |
| 140 | 30 | 0,75 S | N | N | S | S | N | N | N |
| 60  | 30 | 0,25 N | N | N | N | N | N | N | N |
| 110 | 40 | 1,5 S  | S | N | S | N | N | N | N |
| 56  | 30 | 1 S    | N | N | S | N | N | N | N |
| 52  | 40 | 2 S    | N | N | S | N | N | N | N |
| 52  | 40 | 2 N    | N | N | N | N | N | N | N |
| 100 |    | N      | N | N | N | N | N | N | N |
| 80  | 40 | 0 N    | N | N | N | N | N | N | N |
| 50  |    | S      | S | N | N | N | N | N | N |
| 111 |    | S      | N | N | N | S | N | N | N |
| 80  |    | S      | N | N | N | N | N | S | N |
| 80  |    | S      | N | N | N | N | N | S | N |
| 104 |    | S      | S | N | S | N | N | N | N |
| 90  |    | S      | N | N | S | N | N | N | N |
| 94  | 40 | 0 N    | N | N | N | N | N | N | N |
| 41  | 40 | 1,25 N | N | N | N | N | N | N | N |
| 60  | 40 | 1,25 N | N | N | N | N | N | N | N |
| 100 | 30 | 0,25 S | S | N | N | N | N | N | N |
|     |    | N      | N | N | N | N | N | N | N |
| 50  | 30 | 0,5 S  | N | N | S | N | N | N | N |
| 100 | 20 | 0,5 N  | N | N | N | N | N | N | N |
| 70  |    | S      | N | N | N | N | N | N | N |
| 76  | 30 | 1,5 N  | N | N | N | N | N | N | N |
| 70  |    | N      | N | N | N | N | N | N | N |
|     |    | N      | N | N | N | N | N | N | N |
|     |    | N      | N | N | N | N | N | N | N |
| 90  | 40 | 2 N    | N | N | N | N | N | N | N |
| 90  | 30 | 0 S    | N | N | S | N | N | N | N |
| 72  | 20 | 0,5 S  | S | N | N | N | N | N | N |
| 80  | 30 | 0,5 N  | N | N | N | N | N | N | N |
| 80  | 20 | 0,5 N  | N | N | N | N | N | N | N |
|     |    | N      | N | N | N | N | N | N | N |
|     |    | N      | N | N | N | N | N | N | N |
| 80  |    | N      | N | N | N | N | N | N | N |
| 60  | 40 | 2 N    | N | N | N | N | N | N | N |
| 64  | 30 | 1,25 S | N | N | S | N | N | N | N |
| 90  |    | S      | N | N | S | N | N | N | N |
| 92  | 20 | 0,75 S | N | N | S | N | N | N | N |
| 70  |    | S      | N | N | S | N | N | N | N |
|     |    | N      | N | N | N | N | N | N | N |
| 79  | 40 | 2 S    | S | N | S | N | N | N | N |
| 80  | 40 | 2 S    | N | N | S | N | N | N | N |
| 78  | 40 | 1,75 N | N | N | N | N | N | N | N |
| 73  | 30 | 0,75 S | N | N | S | N | N | N | N |
|     |    | N      | N | N | N | N | N | N | N |
| 90  | 40 | 1,25 N | N | N | N | N | N | N | N |
| 80  |    | S      | N | N | S | N | N | N | N |
| 80  | 30 | 1 S    | S | N | N | N | N | N | N |

|     |    |        |   |   |   |   |   |   |   |
|-----|----|--------|---|---|---|---|---|---|---|
| 70  | 30 | 0,5 S  | N | N | S | N | N | N | N |
| 90  | 30 | 1 N    | N | N | N | N | N | N | N |
|     |    | N      | N | N | N | N | N | N | N |
| 70  |    | S      | S | N | N | N | N | N | N |
| 70  |    | N      | N | N | N | N | N | N | N |
| 80  |    | S      | N | N | S | N | N | N | N |
|     |    | N      | N | N | N | N | N | N | N |
| 100 | 30 | 1 S    | S | N | N | N | N | N | N |
|     |    | N      | N | N | N | N | N | N | N |
|     |    | N      | N | N | N | N | N | N | N |
| 93  | 30 | 1 S    | S | N | S | N | N | N | N |
| 70  |    | N      | N | N | N | N | N | N | N |
| 60  |    | N      | N | N | N | N | N | N | N |
| 100 |    | S      | N | N | N | S | N | N | N |
| 80  | 30 | 0,5 N  | N | N | N | N | N | N | N |
| 80  | 30 | 0,75 S | S | N | S | N | N | N | N |
| 80  |    | N      | N | N | N | N | N | N | N |
| 81  | 30 | N      | N | N | N | N | N | N | N |
| 90  |    | S      | S | N | S | N | N | N | N |

| Tremor | Taquipneia | Tipo   | CSD ANORMAL | QLD ANORMAL | Reserva B -DA | Reserva Ax B - DA |
|--------|------------|--------|-------------|-------------|---------------|-------------------|
| N      | N          | 0      | S           | S           | 1,03          | 1,33              |
| N      | N          | Dor pr | S           | S           | 2,49          | 2,40              |
| N      | N          | Dor pr | N           | N           | 2,98          | 3,82              |
| N      | N          | 0      | S           | S           | 1,70          | 2,96              |
| N      | N          | Dor pr | N           | N           | 1,64          | 1,85              |
| N      | N          | 0      | N           | N           | 3,20          | 4,06              |
| N      | N          | 0      | N           | N           | 2,98          | 5,88              |
| N      | N          | 0      | N           | N           | 1,99          | 1,64              |
| N      | N          | ESV    | N           | N           | 3,12          | 3,70              |
| N      | N          | 0      | N           | N           | 3,51          | 3,13              |
| N      | N          | Dor lo | N           | N           | 3,47          | 2,98              |
| N      | N          | HAS    | S           | S           | 1,69          | 1,22              |
| N      | N          | Dor pr | S           | S           | 1,55          | 2,15              |
| N      | N          | ESV    | N           | N           | 3,28          | 4,11              |
| N      | N          | Dor pr | N           | N           | 2,44          | 1,97              |
| N      | N          | 0      | N           | N           | 3,42          | 4,48              |
| N      | N          | 0      | N           | N           | 2,46          | 3,13              |
| N      | N          | 0      | N           | N           | 2,95          | 3,54              |
| N      | N          | ESV    | N           | N           | 3,51          | 3,45              |
| N      | N          | Dor pr | N           | N           | 3,3           | 3,8               |
| N      | N          | ESV    | N           | N           | 2,43          | 3,39              |
| N      | N          | ESV    | S           | S           | 3,09          | 4,93              |
| N      | N          | ESV    | N           | S           | 2,75          | 2,15              |
| N      | N          | 0      | N           | S           | 4,08          | 4,09              |
| N      | N          | 0      | N           | S           | 2,15          | 2,09              |
| N      | N          | 0      | N           | N           | 3,51          | 3,12              |
| N      | N          | ESV    | S           | S           | 1,64          | 2,86              |
| N      | N          | 0      | S           | S           | 3,53          | 4,05              |
| N      | N          | Dor pr | S           | S           | 1,82          | 1,36              |
| N      | N          | 0      | N           | N           | 3,38          | 4,22              |
| N      | N          | 0      | N           | N           | 3,96          | 3,96              |
| N      | N          | Dor pr | S           | S           | 1,85          | 1,04              |
| N      | N          | 0      | N           | N           | 2,56          | 4,78              |
| N      | N          | Hipote | N           | N           | 4,2           | 4,49              |
| N      | N          | ESV    | S           | S           | 2,44          | 3,12              |
| N      | N          | HAS    | N           | N           | 2,69          | 2,46              |
| N      | N          | ESV    | N           | N           | 3,8           | 2,92              |
| N      | N          | ESV    | N           | N           | 2,75          | 2,30              |
| N      | N          | Dor pr | S           | S           | 1,6           | 2,66              |
| N      | N          | ESV    | N           | N           | 2,46          | 1,65              |
| N      | N          | Hipote | S           | S           | 1,17          | 1,31              |
| N      | N          | ESV    | N           | N           | 4,37          | 5,76              |
| N      | N          | 0      | S           | S           | 1,75          | 0,72              |
| N      | N          | Dor pr | N           | S           | 3,46          | 1,43              |
|        |            |        | N           | N           | 3,17          | 4,84              |
| N      | N          | 0      | N           | N           | 3,5           | 3,89              |
| N      | N          | 0      | N           | N           | 2,57          | 3,24              |
| N      | N          | ESV    | N           | N           | 3,61          | 4,80              |
| N      | N          | 0      | N           | N           | 4,15          | 6,03              |

|   |   |        |   |   |      |      |
|---|---|--------|---|---|------|------|
| N | N | ESV    | S | S | 0,96 | 1,23 |
| N | N | 0      | N | N | 2,87 | 3,05 |
| N | N | 0      | N | N | 2,77 | 4,45 |
| N | N | Dor pr | N | N | 1,87 | 2,24 |
| N | N | 0      | N | S | 3,38 | 1,74 |
| N | N | 0      | S | S | 1,77 | 1,6  |
| N | N | Dor pr | S | S | 0,74 | 0,80 |
| N | N | ESV    | N | S | 1,73 | 2,13 |
| N | N | 0      | N | N | 3,21 | 4,00 |
| N | N | Dor pr | S | S | 1,63 | 1,59 |
| N | N | ESV    | N | N | 3,62 | 2,82 |
| N | N | Dor pr | N | S | 2,94 | 2,31 |
| N | N | 0      | S | S | 2,17 | 2,39 |
| N | N | 0      | N | N | 4,26 | 4,21 |
| N | N | Dor pr | N | N | 3,61 | 4,08 |
| N | N | ESV    | N | N | 2,12 | 2,68 |
| N | N | 0      | N | N | 3,4  | 3,37 |
| N | N | ESV    | N | S | 2,36 | 2,41 |
| N | N | 0      | N | N | 3,01 | 3,33 |
| N | N | ESV    | N | N | 2,17 | 2,62 |
| N | N | ESV    | N | N | 2,89 | 3,22 |
| N | N | ESV    | S | S | 3,64 | 5,75 |
| N | N | Dor pr | N | N | 3,49 | 5,28 |
| N | N | Dor pr | S | S | 1,38 | 1,52 |
| N | N | 0      | N | N | 2,46 | 3,00 |
| N | N | ESV    | S | S | 1,95 | 1,24 |
| N | N | ESV    | N | N | 1,77 | 1,35 |
| N | N | 0      | N | S | 3,23 | 4,51 |
| N | N | HAS    | N | N | 2,97 | 5,91 |
| N | N | ESV    | S | S | 1,79 | 1,13 |
| N | N | ESV    | N | N | 2,68 | 1,99 |
|   |   |        | N | N | 3,54 | 4,27 |
| N | N | Hipote | S | S | 2,73 | 2,95 |
| N | N | Dor pr | S | S | 1,15 | 1,35 |
| N | N | HAS +  | N | N | 2,77 | 2,04 |
| N | N | 0      | N | S | 1,54 | 2,50 |
| N | N | 0      | N | N | 3,15 | 3,07 |
| N | N | HAS +  | N | N | 2,17 | 1,07 |
| N | N | Dor pr | S | S | 1,26 | 1,40 |
| N | N | 0      | S | S | 1,68 | 0,9  |
| N | N | 0      | N | N | 2,99 | 4,42 |
| N | N | ESV, l | N | N | 2,89 | 3,21 |
| N | N | 0      | N | N | 2,83 | 2,76 |
| N | N | Dor pr | N | S | 4,31 | 2,93 |
| N | N | Dor pr | S | S | 1,51 | 1,43 |
| N | N | ESV    | N | N | 2,31 | 2,23 |
| N | N | ESV    | N | N | 2,93 | 2,66 |
| N | N | ESV    | N | N | 2,93 | 3,63 |
| N | N | Dor pr | N | N | 3,04 | 5,20 |
| N | N | Dor pr | S | S | 1,78 | 1,96 |

|   |   |        |   |   |      |      |
|---|---|--------|---|---|------|------|
| N | N | ESV    | N | N | 2,84 | 2,5  |
| N | N | 0      | N | N | 1,27 | 1,84 |
| N | N | HAS +  | S | S | 1,85 | 2,29 |
| N | N | 0      | S | S | 1,93 | 1,84 |
| N | N | Dor pr | S | S | 1,85 | 0,87 |
| N | N | ESV    | N | N | 2,49 | 2,81 |
| N | N | ESV    | N | N | 3,51 | 2,97 |
| N | N | 0      | N | N | 2,78 | 2,29 |
| N | N | 0      | N | N | 2,98 | 4,36 |
| N | N | 0      | N | N | 4,09 | 5,52 |
| N | N | Dor pr | S | S | 2,76 | 3,63 |
| N | N | HAS    | S | S | 3,38 | 2,91 |
| N | S | Taqui  | S | S | 2,95 | 4,47 |
| N | S | Taqui  | N | N | 3,63 | 4,5  |
| N | N | Dor pr | S | S | 1,95 | 1,84 |
| N | N | ESV    | N | N | 2,79 | 4,38 |
| N | N | 0      | N | N | 4,29 | 4,52 |
| N | N | 0      | N | N | 3,8  | 2,06 |
| N | N | 0      | N | N | 3,74 | 2,48 |
| N | N | Dor pr | N | N | 2,84 | 2,99 |
| N | N | 0      | N | N | 3,21 | 3,79 |
| N | N | ESV    | S | S | 1,75 | 2,13 |
| N | N | 0      | S | S | 1,46 | 1,41 |
| S | N | Tremc  | N | N | 2,47 | 3,66 |
| N | N | 0      | N | N | 3,02 | 3,7  |
| N | N | 0      | N | S | 2,72 | 3,29 |
| N | N | 0      | N | S | 3,87 | 4,25 |
| N | N | 0      | S | S | 3,57 | 4,65 |
| N | N | 0      | N | N | 3,65 | 2,13 |
| N | N | ESV    | S | S | 3,32 | 3,11 |
| N | N | Dor pr | S | S | 1,51 | 1,15 |
| N | N | 0      | S | S | 1,35 | 2,91 |
| N | N | 0      | N | N | 3,68 | 3,59 |
| N | N | 0      | N | N | 3,62 | 5,27 |
| N | N | 0      | S | S | 1,09 | 1,57 |
| N | N | 0      | N | N | 1,93 | 2,60 |
| N | N | 0      | S | S | 3,12 | 2,48 |
| N | N | ESV    | S | S | 1,69 | 2,74 |
| N | N | ESV    | S | S | 2,55 | 3,09 |
| N | N | ESV    | N | N | 3,83 | 5,32 |
| N | N | ESV    | N | N | 3,06 | 2,86 |
| N | N | 0      | N | N | 2,19 | 3,11 |
| N | N | Dor pr | S | S | 1,7  | 1,97 |
| N | N | ESV    | N | S | 3,31 | 3,1  |
| N | N | 0      | N | N | 3,42 | 5,16 |
| N | N | ESV    | N | N | 3,68 | 3,87 |
| N | N | 0      | S | S | 1,96 | 1,61 |
| N | N | 0      | N | N | 3,8  | 6,58 |
| N | N | ESV    | N | N | 0,70 | 0,97 |
| N | N | Dor pr | N | S | 1,53 | 1,59 |

|   |   |        |   |   |      |      |
|---|---|--------|---|---|------|------|
| N | N | ESV    | N | N | 4,2  | 3,47 |
| N | N | 0      | N | N | 3,75 | 3,25 |
| N | N | 0      | S | S | 1,16 | 1,74 |
| N | N | Dor pr | S | S | 1,67 | 2,04 |
| N | N | 0      | N | N | 2,27 | 2,59 |
| N | N | ESV    | S | S | 1,66 | 2,03 |
| N | N | 0      | N | N | 3,64 | 5,36 |
| N | N | Dor pr | S | S | 1,54 | 1,18 |
| N | N | 0      | S | S | 1,38 | 2,25 |
| N | N | 0      | S | S | 2,11 | 2,87 |
| N | N | Dor pr | S | S | 1,99 | 1,5  |
| N | N | 0      | N | N | 3,90 | 4,63 |
| N | N | 0      | N | N | 4,27 | 2,81 |
| N | N | HAS    | S | S | 1,64 | 1,82 |
| N | N | 0      | N | N | 3,81 | 2,19 |
| N | N | Dor pr | N | N | 4,15 | 4,16 |
| N | N | 0      | N | N | 2,56 | 2,41 |
| N | N | 0      | N | N | 1,68 | 3,84 |
| N | N | Dor pr | N | N | 2,35 | 4,58 |



| Reserva B -CX | Reserva AxB - CX | Reserva B -CD | Reserva AxB - CD | IAM | RM | ATC | AI | Morte | Total |
|---------------|------------------|---------------|------------------|-----|----|-----|----|-------|-------|
| 0,99          | 1,16             | 0,99          | 1,13             | N   | N  | N   | N  | S     |       |
| 1,73          | 2,25             | 2,24          | 2,59             | N   | N  | N   | S  | N     |       |
| 3,96          | 4,68             | 3,04          | 4,68             |     |    |     |    |       |       |
| 1,15          | 1,30             | 1,46          | 1,39             |     |    |     |    |       |       |
| 2,96          | 3,24             | 2,26          | 2,57             | N   | N  | S   | N  | N     |       |
| 3,25          | 3,77             | 2,33          | 3,13             |     |    |     |    |       |       |
| 3,25          | 4,43             | 3,05          | 2,96             |     |    |     |    |       |       |
| 3,64          | 3,95             | 2,10          | 1,83             |     |    |     |    |       |       |
| 2,63          | 3,15             | 3,08          | 4,00             |     |    |     |    |       |       |
| 3,82          | 4,58             | 2,98          | 2,51             |     |    |     |    |       |       |
| 3,25          | 3,01             | 3,57          | 3,43             |     |    |     |    |       |       |
| 1,64          | 1,97             | 2,44          | 1,59             | N   | S  | N   | S  | N     |       |
| 0,90          | 1,04             | 1,02          | 1,17             |     |    |     |    |       |       |
| 3,44          | 2,01             | 2,7           | 2,95             |     |    |     |    |       |       |
| 1,86          | 1,6              | 1,42          | 0,81             | N   | S  | N   | N  | N     |       |
| 2,42          | 2,91             | 2,77          | 3,43             |     |    |     |    |       |       |
| 2,81          | 3,63             | 7,72          | 10,33            |     |    |     |    |       |       |
| 3,41          | 6,10             | 3,29          | 3,87             |     |    |     |    |       |       |
| 3,33          | 2,6              | 3,1           | 3,26             | S   | N  | N   | N  | N     |       |
| 3,47          | 2,48             | 3,63          | 4,97             |     |    |     |    |       |       |
| 2,64          | 3,01             | 2,47          | 2,61             |     |    |     |    |       |       |
| 2,6           | 0,75             | 1,98          | 0,87             |     |    |     |    |       |       |
| 1,48          | 2,13             | 1,70          | 1,25             | N   | S  | N   | N  | N     |       |
| 3,31          | 3,45             | 3,61          | 2,81             |     |    |     |    |       |       |
| 1,42          | 2,67             | 1,50          | 2,44             | N   | S  | N   | N  | N     |       |
| 3,73          | 4,06             | 3,63          | 3,47             |     |    |     |    |       |       |
| 1,93          | 1,68             | 1,87          | 1,44             |     |    |     |    |       |       |
| 1,98          | 1,62             | 1,87          | 1,5              |     |    |     |    |       |       |
| 1,33          | 1,4              | 1,3           | 1,01             | N   | S  | N   | N  | N     |       |
| 3,02          | 3,23             | 3,08          | 2,57             |     |    |     |    |       |       |
| 4,89          | 5,84             | 3,95          | 4,93             |     |    |     |    |       |       |
| 2,00          | 0,84             | 1,26          | 2,36             | N   | S  | N   | N  | N     |       |
| 2,53          | 3,12             | 2,98          | 6,04             |     |    |     |    |       |       |
| 3,27          | 5,83             | 3,31          | 5,24             |     |    |     |    |       |       |
| 1,15          | 1,49             | 2,71          | 3,19             |     |    |     |    |       |       |
| 3,38          | 6,04             | 1,69          | 1,11             |     |    |     |    |       |       |
| 2,86          | 3,29             | 3,76          | 4,25             |     |    |     |    |       |       |
| 2,93          | 1,41             | 3,76          | 6,81             |     |    |     |    |       |       |
| 1,72          | 1,29             | 2,36          | 1,43             | N   | N  | N   | N  | S     |       |
| 3,22          | 2                | 3,05          | 3,4              |     |    |     |    |       |       |
| 1,01          | 1,46             | 1,17          | 1,27             |     |    |     |    |       |       |
| 4,34          | 6,63             | 3,84          | 5,42             |     |    |     |    |       |       |
| 1,82          | 1,56             | 1,48          | 1,32             |     |    |     |    |       |       |
| 3,37          | 3,98             | 1,65          | 0,62             |     |    |     |    |       |       |
| 3,27          | 5,72             | 3,55          | 3,54             |     |    |     |    |       |       |
| 2,84          | 2,88             | 3,4           | 3,48             |     |    |     |    |       |       |
| 3,73          | 3,70             | 1,67          | 2,11             |     |    |     |    |       |       |
| 3,12          | 4,13             | 3,04          | 3,85             |     |    |     |    |       |       |
| 4,13          | 5,89             | 4,69          | 5,82             |     |    |     |    |       |       |

|      |      |      |        |   |   |   |   |  |
|------|------|------|--------|---|---|---|---|--|
| 2,15 | 2,75 | 2,09 | 2,57   |   |   |   |   |  |
| 2,76 | 2,24 | 2,61 | 3,36   |   |   |   |   |  |
| 4,33 | 6,07 | 2,74 | 4,09   |   |   |   |   |  |
| 1,71 | 2,09 | 1,92 | 2,73   |   |   |   |   |  |
| 4,34 | 3,07 | 1,8  | 1,98   |   |   |   |   |  |
| 1,74 | 2,96 | 1,79 | 1,59   |   |   |   |   |  |
| 1,20 | 1,66 | 1,41 | 1,77 N | S | N | N | N |  |
| 1,69 | 2,25 | 2,14 | 2,42 N | S | N | S | N |  |
| 2,55 | 3,10 | 2,09 | 2,81   |   |   |   |   |  |
| 1,48 | 1,40 | 1,76 | 1,52 N | S | N | S | N |  |
| 4,27 | 3,7  | 3,36 | 4,05   |   |   |   |   |  |
| 1,75 | 2,19 | 1,94 | 0,8 N  | S | N | N | N |  |
| 2,31 | 2,49 | 1,82 | 1,92   |   |   |   |   |  |
| 5,37 | 5,21 | 3,23 | 4,18   |   |   |   |   |  |
| 2,86 | 3,81 | 2,17 | 2,35   |   |   |   |   |  |
| 2,27 | 2,82 | 7,11 | 8,05   |   |   |   |   |  |
| 3,54 | 2,96 | 3,29 | 3,52   |   |   |   |   |  |
| 1,83 | 1,38 | 3,27 | 3,1 N  | N | S | N | N |  |
| 2,74 | 4,94 | 3,48 | 4,47   |   |   |   |   |  |
| 2,31 | 2,67 | 1,82 | 2,28 N | S | N | S | N |  |
| 3,65 | 4,19 | 2,72 | 3,92   |   |   |   |   |  |
| 1,96 | 3,16 | 2,48 | 2,2    |   |   |   |   |  |
| 2,86 | 3,44 | 2,79 | 3,76   |   |   |   |   |  |
| 1,25 | 1,14 | 1,33 | 1,91 N | S | N | N | N |  |
| 2,81 | 3,52 | 3,22 | 3,88   |   |   |   |   |  |
| 2,61 | 4,79 | 3,24 | 3,82   |   |   |   |   |  |
| 2,78 | 2,03 | 2,69 | 2,45   |   |   |   |   |  |
| 3,13 | 2,87 | 4,29 | 5,93   |   |   |   |   |  |
| 4,75 | 6,77 | 2,77 | 2,64   |   |   |   |   |  |
| 1,76 | 2,39 | 2,61 | 1,70 N | S | N | N | N |  |
| 2,47 | 2,56 | 3,02 | 2,9    |   |   |   |   |  |
| 4,75 | 4,59 | 3,86 | 2,39   |   |   |   |   |  |
| 1,88 | 2,35 | 2,23 | 2,76 N | S | N | N | N |  |
| 0,63 | 0,79 | 1,57 | 1,59 N | S | N | N | N |  |
| 2,98 | 2,46 | 2,91 | 2,05   |   |   |   |   |  |
| 1,61 | 2,06 | 1,56 | 1,52 S | N | N | N | N |  |
| 3,69 | 3,84 | 3,09 | 1,90   |   |   |   |   |  |
| 1,76 | 1,1  | 2,62 | 2,57   |   |   |   |   |  |
| 0,84 | 0,99 | 2,01 | 2,97   |   |   |   |   |  |
| 2,93 | 1,02 | 3,28 | 2,93   |   |   |   |   |  |
| 3,62 | 2,86 | 3,26 | 2,39   |   |   |   |   |  |
| 1,80 | 1,72 | 2,31 | 2,54   |   |   |   |   |  |
| 3,14 | 2,57 | 3,28 | 3,87   |   |   |   |   |  |
| 4,2  | 4,83 | 1,88 | 1,12 N | S | N | N | N |  |
| 1,34 | 1,13 | 1,34 | 1,21   |   |   |   |   |  |
| 2,53 | 1,77 | 3,00 | 2,83   |   |   |   |   |  |
| 3,2  | 5,33 | 3,33 | 3,19   |   |   |   |   |  |
| 3,58 | 4,50 | 1,74 | 2,78   |   |   |   |   |  |
| 2,16 | 5,04 | 2,96 | 2,60   |   |   |   |   |  |
| 2,10 | 2,30 | 2,36 | 2,14 N | S | N | N | N |  |

|    |      |      |      |        |   |   |   |   |  |
|----|------|------|------|--------|---|---|---|---|--|
|    | 3,1  | 1,93 | 3,7  | 3,84   |   |   |   |   |  |
|    | 3,12 | 3,74 | 0,92 | 1,39 S | N | N | N | S |  |
|    | 2,45 | 2,11 | 2,4  | 2,13   |   |   |   |   |  |
|    | 1,66 | 1,32 | 3,75 | 4,56   |   |   |   |   |  |
|    | 1,94 | 2,17 | 2,04 | 1,94   |   |   |   |   |  |
|    | 3,32 | 2,05 | 2,68 | 3,46   |   |   |   |   |  |
|    | 3,19 | 3,38 | 3,75 | 3,92   |   |   |   |   |  |
|    | 3,3  | 1,7  | 2,61 | 3,25   |   |   |   |   |  |
|    | 2,33 | 2,45 | 3,36 | 4,05 N | N | S | S | N |  |
|    | 1,8  | 3,41 | 1,84 | 1,79 N | S | N | N | N |  |
|    | 3,44 | 5,49 | 2,59 | 3,41 N | N | S | N | N |  |
|    | 2,93 | 2,63 | 2,93 | 1,93   |   |   |   |   |  |
|    | 2,41 | 3,10 | 2,72 | 3,84   |   |   |   |   |  |
|    | 4,44 | 5,56 | 3,16 | 4,75   |   |   |   |   |  |
|    | 2,44 | 2,71 | 1,90 | 2,04 N | N | N | S | N |  |
|    | 2,54 | 3,17 | 4,01 | 4,98   |   |   |   |   |  |
|    | 4,13 | 4,14 | 4,1  | 3,88 N | S | N | N | N |  |
|    | 3,75 | 3,19 | 3,35 | 3,31   |   |   |   |   |  |
|    | 3,44 | 3,44 | 3,9  | 4,21   |   |   |   |   |  |
|    | 2,8  | 2,1  | 2,97 | 2,14   |   |   |   |   |  |
|    | 3,89 | 5,20 | 2,95 | 3,91   |   |   |   |   |  |
|    | 2,87 | 1,66 | 3,06 | 2,33   |   |   |   |   |  |
|    | 1,61 | 1,81 | 1,45 | 1,6    |   |   |   |   |  |
|    | 3,15 | 3,70 | 0,77 | 0,89   |   |   |   |   |  |
|    | 2,48 | 3,33 | 3,91 | 4,51   |   |   |   |   |  |
|    | 2,55 | 3,66 | 3,00 | 2,14   |   |   |   |   |  |
|    | 4,86 | 6,08 | 3,29 | 3,84   |   |   |   |   |  |
|    | 2,46 | 2,92 | 2,51 | 3,18   |   |   |   |   |  |
|    | 3,38 | 3,61 | 3,08 | 1,89   |   |   |   |   |  |
|    | 1,89 | 1,65 | 1,88 | 1,85   |   |   |   |   |  |
|    | 1,66 | 1,53 | 2,23 | 1,84   |   |   |   |   |  |
|    | 1,5  | 2,34 | 1,74 | 1,72 N | S | N | N | N |  |
|    | 3,88 | 4,35 | 3,65 | 4,04   |   |   |   |   |  |
|    | 2,94 | 3,50 | 2,91 | 4,07   |   |   |   |   |  |
|    | 1,56 | 2,06 | 0,62 | 0,69 N | N | N | S | N |  |
| NA | NA   |      | 3,06 | 4,88   |   |   |   |   |  |
|    | 2,45 | 7,21 | 3,33 | 3,61   |   |   |   |   |  |
|    | 1,73 | 2,22 | 1,88 | 2,67   |   |   |   |   |  |
|    | 2,53 | 4,06 | 1,73 | 1,00   |   |   |   |   |  |
|    | 3,27 | 6,12 | 2,98 | 2,76   |   |   |   |   |  |
|    | 3,00 | 3,24 | 2,61 | 2,71   |   |   |   |   |  |
|    | 1,87 | 2,19 | 1,99 | 2,41   |   |   |   |   |  |
|    | 1,69 | 1,67 | 1,79 | 2,87   |   |   |   |   |  |
|    | 4,19 | 6,25 | 3,33 | 4,21   |   |   |   |   |  |
|    | 3,17 | 5,32 | 3,1  | 3,77   |   |   |   |   |  |
|    | 2,97 | 3,13 | 3,04 | 4,84   |   |   |   |   |  |
|    | 1,50 | 2,56 | 2,43 | 3,14 N | S | N | N | N |  |
|    | 3,49 | 2,09 | 3,6  | 5,83   |   |   |   |   |  |
|    | 0,54 | 0,73 | 1,56 | 2,08 S | S | N | N | N |  |
|    | 2,17 | 3,29 | 2,89 | 2,28 N | S | N | N | N |  |

|    |      |      |      |      |   |   |   |   |   |
|----|------|------|------|------|---|---|---|---|---|
|    | 3,52 | 3,43 | 3,71 | 4,45 |   |   |   |   |   |
|    | 3,98 | 5,37 | 3,57 | 1,22 |   |   |   |   |   |
|    | 2,02 | 2,77 | 1,52 | 2,40 | N | S | N | S | N |
|    | 2,89 | 1,65 | 2,29 | 3,02 |   |   |   |   |   |
|    | 2,36 | 2,93 | 1,91 | 2,38 |   |   |   |   |   |
|    | 1,49 | 2,25 | 1,66 | 1,64 | N | N | S | S | N |
|    | 2,69 | 3,71 | 2,85 | 4,38 |   |   |   |   |   |
|    | 3,26 | 4,78 | 3,03 | 7,57 |   |   |   |   |   |
|    | 1,26 | 1,60 | 1,69 | 2,28 | N | S | N | S | N |
|    | 1,93 | 3,11 | 1,29 | 1,83 |   |   |   |   |   |
|    | 1,8  | 2,45 | 3,71 | 2,36 |   |   |   |   |   |
| NA | NA   |      | 2,04 | 2,51 |   |   |   |   |   |
|    | 4,05 | 5,62 | 3,21 | 3,27 |   |   |   |   |   |
|    | 2,98 | 2,12 | 1,70 | 2,35 |   |   |   |   |   |
|    | 2,39 | 3,11 | 3,48 | 3,71 |   |   |   |   |   |
|    | 3,59 | 4,78 | 3,47 | 3,73 |   |   |   |   |   |
|    | 2,64 | 2,54 | 2,84 | 4,57 | N | N | N | N | S |
|    | 1,72 | 1,9  | 1,85 | 2,98 |   |   |   |   |   |
|    | 2,98 | 3,45 | 2,42 | 3,01 |   |   |   |   |   |





|     |   |    |     |    |    |    |     |     |     |     |    |    |
|-----|---|----|-----|----|----|----|-----|-----|-----|-----|----|----|
|     |   | 0  | 0   | 0  | 0  | 0  | 0   | 0   | 0   | 0   | 0  | 0  |
| IAM | S | 0  | 90  | 70 | 0  | 0  | 60  | 100 | 0   | 0   | 0  | 0  |
|     |   | 0  | 46  | 58 | 0  | 0  | 0   | 0   | 0   | 0   | 0  | 0  |
|     |   | 0  | 0   | 0  | 0  | 0  | 0   | 0   | 66  | 62  | 62 | 71 |
|     |   | 0  | 69  | 59 | 0  | 73 | 0   | 76  | 0   | 0   | 75 | 0  |
|     |   | 0  | 0   | 0  | 0  | 0  | 0   | 0   | 0   | 0   | 0  | 0  |
|     |   | 0  | 0   | 42 | 0  | 0  | 0   | 0   | 0   | 0   | 0  | 0  |
|     |   | 0  | 0   | 0  | 0  | 0  | 0   | 0   | 0   | 0   | 0  | 0  |
| SC  | N | 0  | 0   | 0  | 0  | 0  | 0   | 0   | 80  | 0   | 0  | 0  |
| SC  | N | 0  | 69  | 50 | 0  | 0  | 100 | 57  | 0   | 0   | 0  | 0  |
| SC  | N | 0  | 70  | 0  | 0  | 0  | 0   | 0   | 0   | 100 | 0  | 0  |
|     |   | 0  | 0   | 0  | 0  | 0  | 0   | 0   | 0   | 0   | 0  | 0  |
|     |   | 0  | 0   | 0  | 0  | 0  | 0   | 0   | 0   | 0   | 0  | 0  |
| SC  | N | 0  | 100 | 50 | 0  | 0  | 52  | 85  | 0   | 100 | 0  | 0  |
|     |   | 0  | 0   | 0  | 0  | 0  | 0   | 0   | 0   | 0   | 0  | 0  |
| SC  | N | 62 | 62  | 0  | 0  | 0  | 0   | 0   | 63  | 30  | 0  | 0  |
|     |   | 0  | 0   | 0  | 53 | 0  | 0   | 0   | 0   | 32  | 0  | 0  |
|     |   | 0  | 30  | 0  | 0  | 0  | 0   | 0   | 0   | 55  | 0  | 0  |
|     |   | 0  | 0   | 0  | 0  | 0  | 0   | 0   | 0   | 0   | 0  | 0  |
|     |   | 0  | 0   | 0  | 0  | 0  | 0   | 0   | 0   | 0   | 0  | 0  |
|     |   | 0  | 30  | 0  | 0  | 0  | 0   | 0   | 0   | 0   | 0  | 0  |
|     |   | 0  | 52  | 0  | 52 | 0  | 100 | 88  | 0   | 33  | 0  | 0  |
|     |   | 0  | 0   | 0  | 0  | 0  | 0   | 0   | 0   | 0   | 0  | 0  |
|     |   | 0  | 0   | 0  | 0  | 0  | 0   | 0   | 0   | 0   | 0  | 0  |
|     |   | 0  | 0   | 0  | 0  | 0  | 0   | 0   | 0   | 0   | 0  | 0  |
|     |   | 0  | 100 | 40 | 0  | 0  | 0   | 0   | 0   | 0   | 0  | 40 |
|     |   | 0  | 0   | 0  | 0  | 0  | 0   | 0   | 0   | 0   | 0  | 0  |
|     |   | 0  | 0   | 0  | 0  | 0  | 0   | 0   | 0   | 0   | 0  | 0  |
|     |   | 0  | 66  | 65 | 0  | 89 | 56  | 0   | 88  | 0   | 57 | 0  |
|     |   | 0  | 100 | 0  | 0  | 0  | 0   | 0   | 0   | 0   | 0  | 0  |
| SC  | N | 0  | 65  | 70 | 0  | 0  | 100 | 68  | 0   | 62  | 52 | 52 |
|     |   | 0  | 0   | 0  | 0  | 0  | 0   | 0   | 0   | 0   | 0  | 0  |
|     |   | 0  | 60  | 90 | 0  | 0  | 0   | 40  | 0   | 40  | 0  | 0  |
| SC  | N | 0  | 60  | 0  | 0  | 0  | 0   | 90  | 0   | 0   | 0  | 0  |
|     |   | 0  | 0   | 70 | 80 | 0  | 0   | 0   | 0   | 0   | 60 | 0  |
|     |   | 0  | 0   | 0  | 0  | 0  | 0   | 0   | 0   | 0   | 0  | 0  |
|     |   | 0  | 100 | 0  | 0  | 0  | 81  | 0   | 0   | 72  | 69 | 0  |
|     |   | 0  | 0   | 0  | 0  | 0  | 0   | 0   | 56  | 100 | 0  | 0  |
|     |   | 0  | 0   | 0  | 0  | 0  | 0   | 0   | 0   | 0   | 0  | 0  |
|     |   | 0  | 0   | 0  | 0  | 0  | 0   | 0   | 0   | 0   | 0  | 0  |
|     |   | 0  | 0   | 0  | 0  | 0  | 0   | 0   | 0   | 0   | 0  | 0  |
|     |   | 55 | 83  | 0  | 0  | 0  | 0   | 0   | 0   | 67  | 71 | 0  |
|     |   | 0  | 39  | 74 | 0  | 0  | 59  | 0   | 0   | 68  | 0  | 0  |
|     |   | 0  | 0   | 0  | 0  | 0  | 0   | 0   | 0   | 0   | 0  | 0  |
|     |   | 0  | 0   | 0  | 0  | 0  | 46  | 0   | 100 | 53  | 31 | 41 |
| SC  | N | 0  | 70  | 0  | 0  | 0  | 77  | 0   | 0   | 100 | 0  | 0  |
|     |   | 0  | 0   | 0  | 0  | 0  | 0   | 0   | 0   | 0   | 0  | 0  |
| SC  | N | 0  | 0   | 0  | 0  | 0  | 0   | 0   | 0   | 80  | 0  | 0  |
| SC  | N | 0  | 67  | 66 | 56 | 0  | 61  | 0   | 0   | 39  | 0  | 0  |
